# Supplementary material for: K6P2W18O62 encapsulated into magnetic Fe3O4/MIL-101 (Cr) metal–organic framework: a novel magnetically recoverable nanoporous adsorbent for ultrafast treatment of aqueous organic pollutants solutions
Source: Royal Society of Chemistry journal article supplement (doi:10.1039/c8ra06287k), 2018-01-01
Supplement: c8ra06287k1.pdf [file c8ra06287k1.pdf]

## Supplementary information

### **K<sub>6</sub>P<sub>2</sub>W<sub>18</sub>O<sub>62</sub> encapsulated into magnetic Fe<sub>3</sub>O<sub>4</sub>/MIL-101 (Cr) metal-organic framework: A novel magnetically recoverable nanoporous adsorbent for ultrafast treatment of aqueous organic pollutants solutions**

Afsoon Jarrah and Saeed Farhadi\*

Department of chemistry, Lorestan University, Khoramabad, 68151-44316, Iran

\*Corresponding author: Tel: +986633120611, fax: +986633120618.

Email address: [sfarhadi1348@yahoo.com](mailto:sfarhadi1348@yahoo.com) (S. Farhadi)

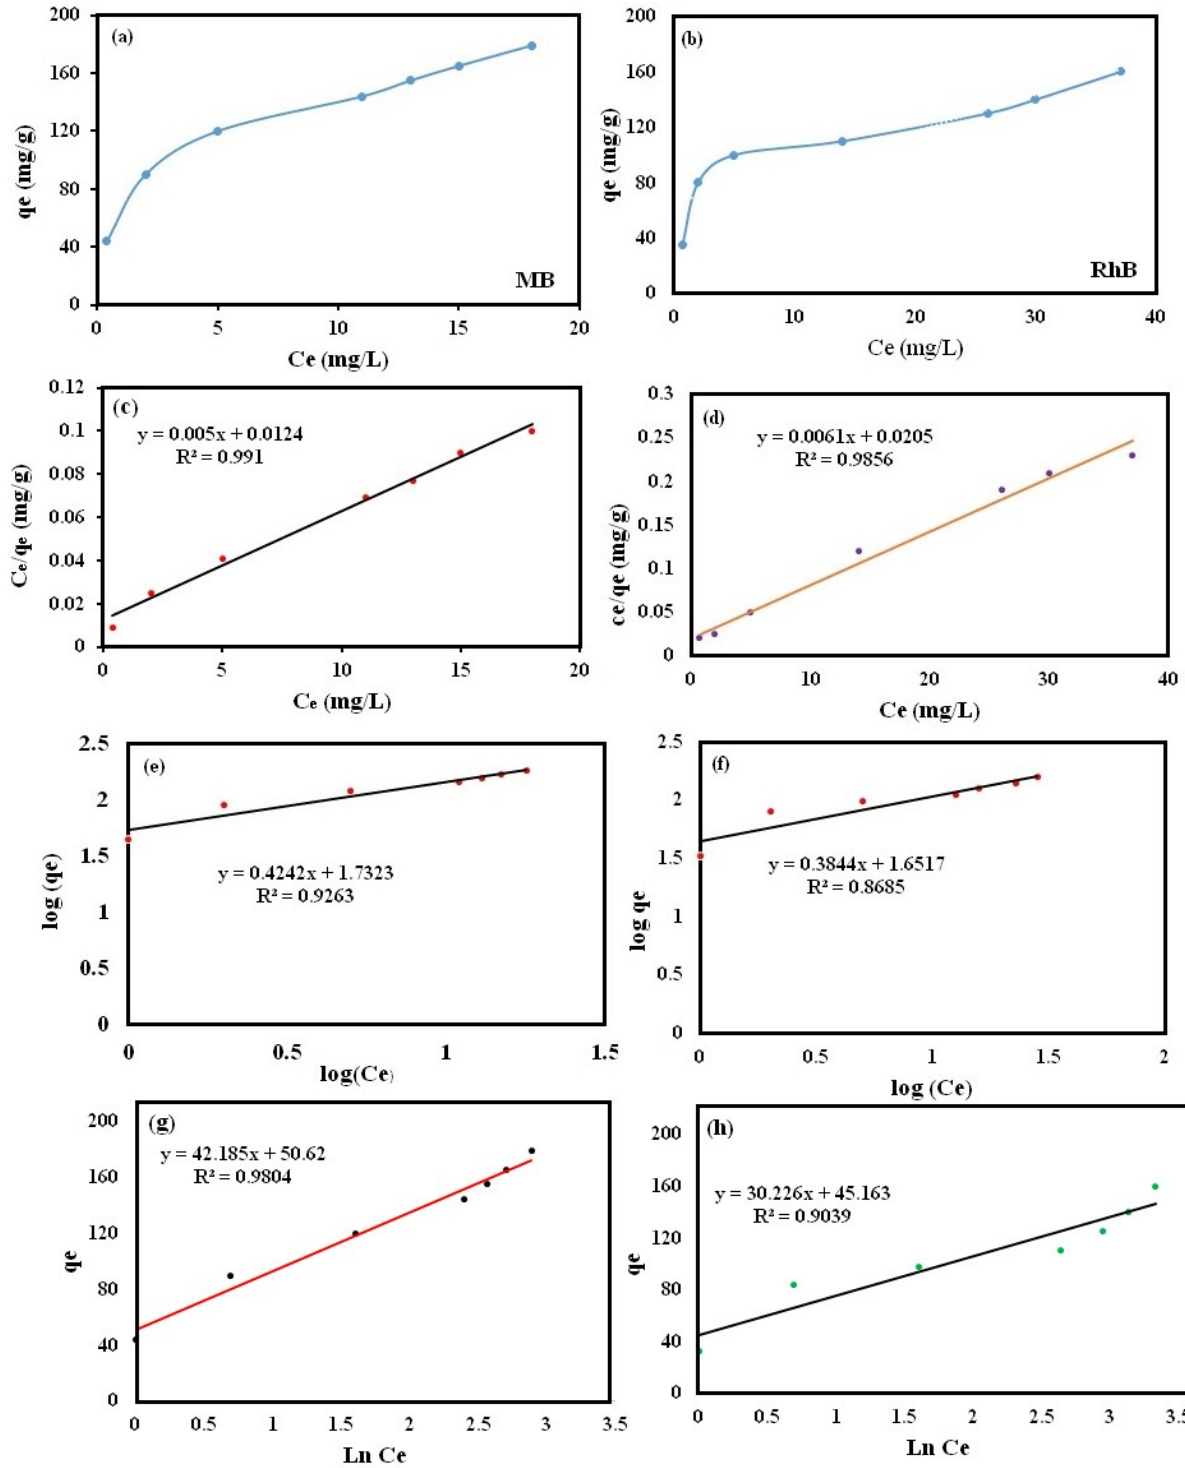

Fig.S1. Adsorption isotherms for dyes on magnetic nanohybrid at different concentration (a) MB, (b) RhB, (c) and (d) Langmuir adsorption isotherms, (e) and (f) Freundlich adsorption isotherms and (g) and (h) Temkin adsorption isotherms.
